# Supplementary material for: A gene-based capture assay for surveying patterns of genetic diversity and insecticide resistance in a worldwide group of invasive mosquitoes
Source: PubMed Central journal article supplement (PMC9387926; doi:10.1371/journal.pntd.0010689), 2022-08-08
Supplement: pntd.0010689.s007.pdf [file pntd.0010689.s007.pdf]

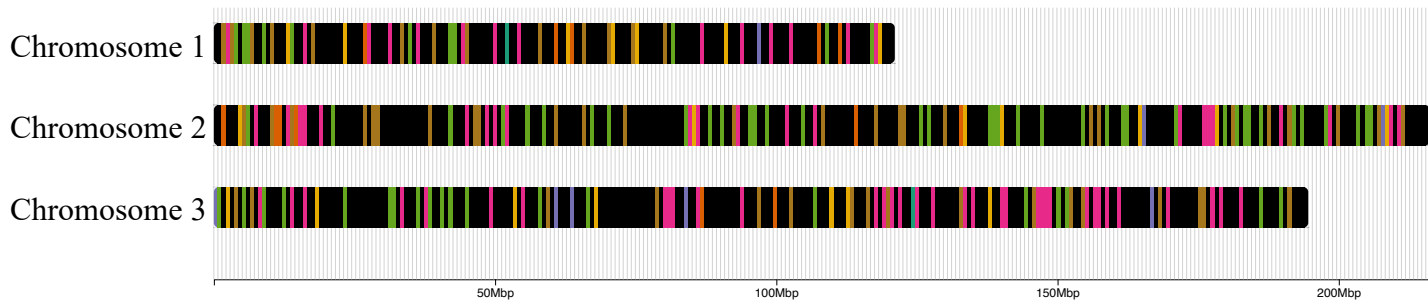

- Acetylcholinesterase
- Cadherin
- Esterase
- P450
- Rapidly\_Evolving
- Slow\_Evolving
- Sodium\_Channel
