# Supplementary material for: A gene-based capture assay for surveying patterns of genetic diversity and insecticide resistance in a worldwide group of invasive mosquitoes
Source: PubMed Central journal article supplement (PMC9387926; doi:10.1371/journal.pntd.0010689), 2022-08-08

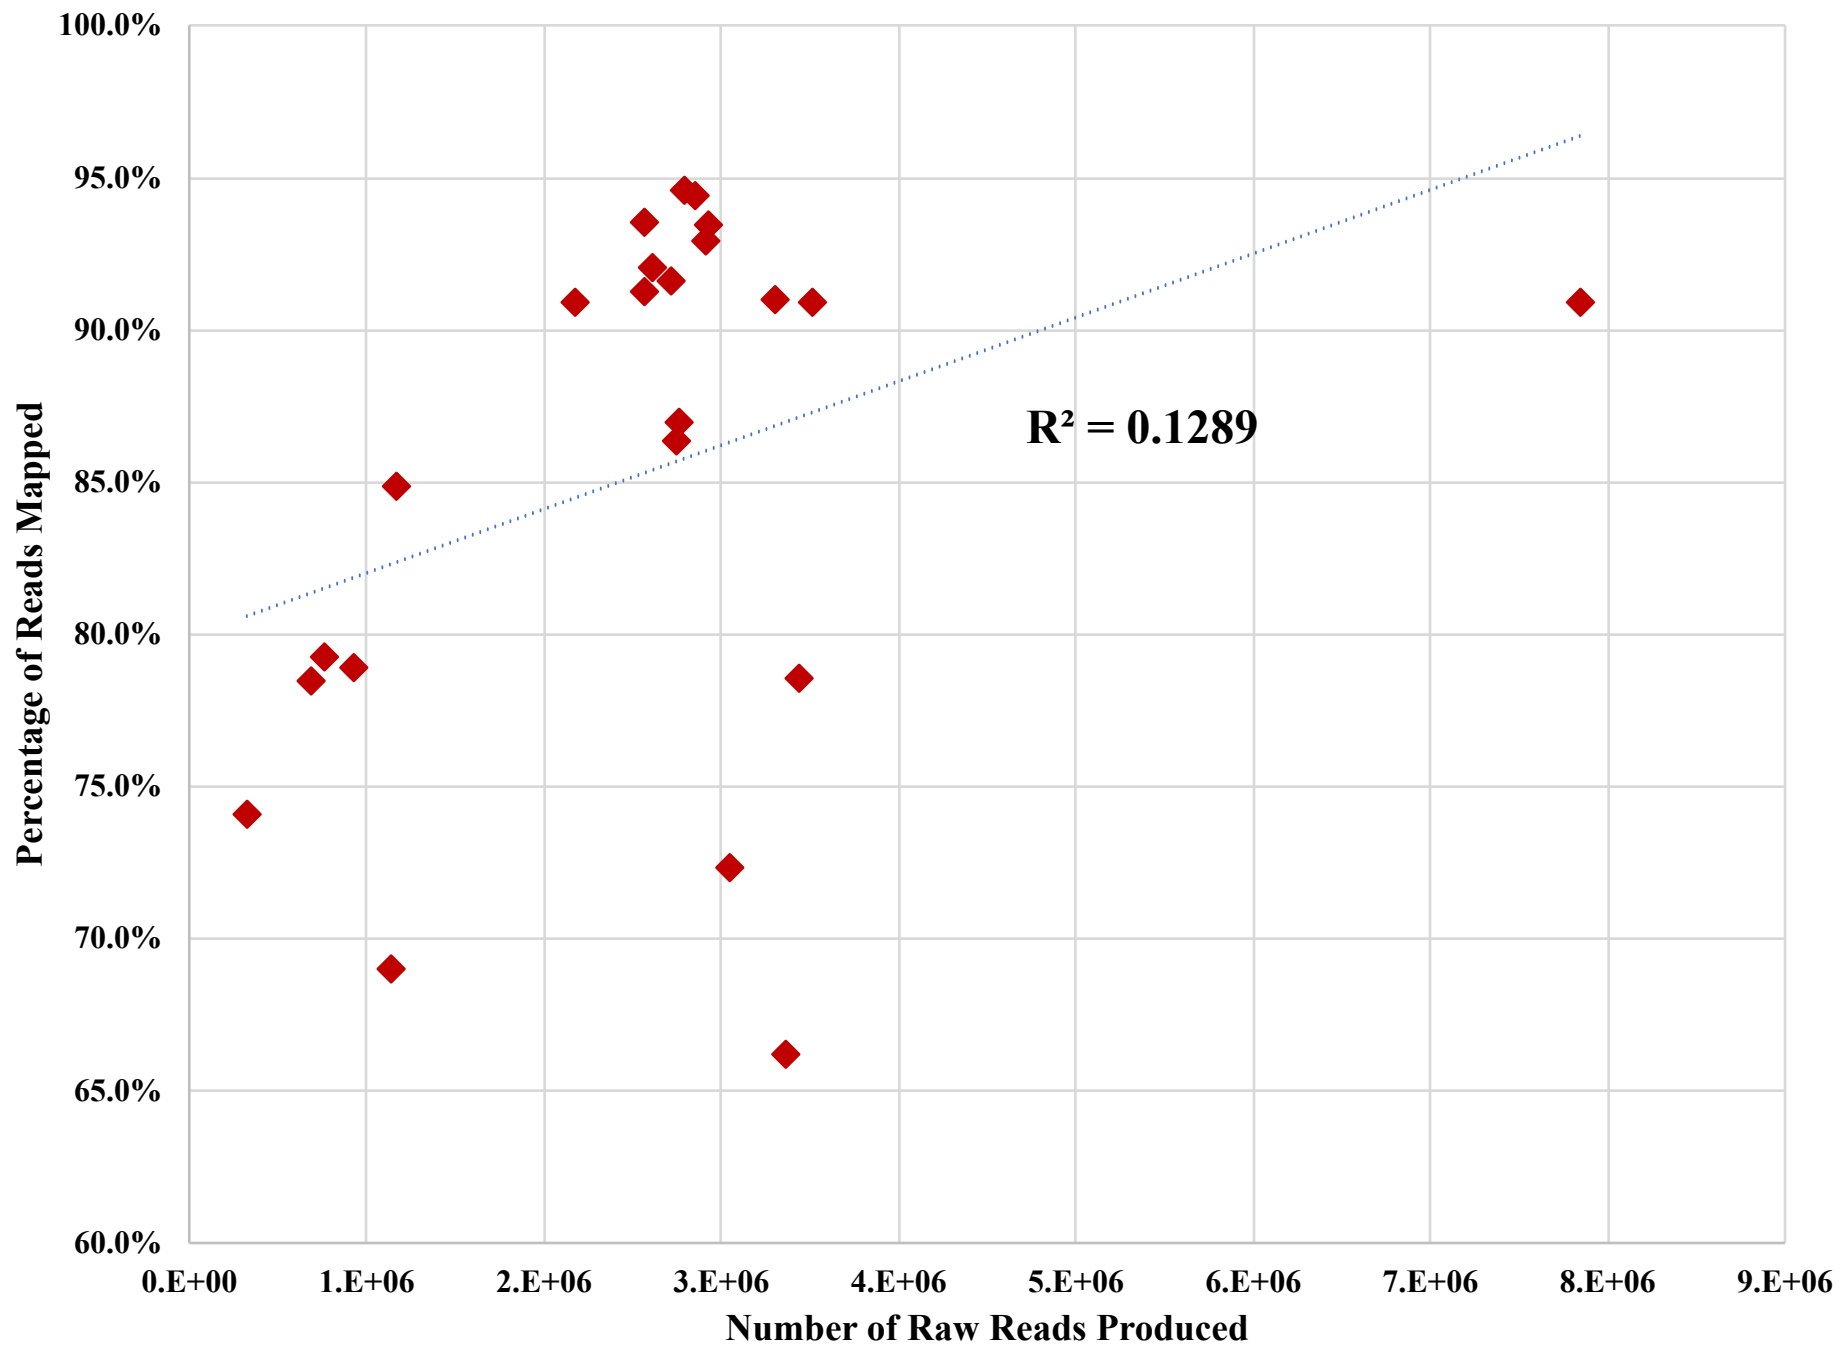

Supplement: pntd.0010689.s011.pdf [file pntd.0010689.s011.pdf]
